# Supplementary material for: Examining variations in hospital productivity in the English NHS
Source: PubMed Central journal article supplement (PMC4361750; doi:10.1007/s10198-014-0569-5), 2014-02-25
Supplement: 10198_2014_569_MOESM2_ESM.pdf [file 10198_2014_569_MOESM2_ESM.pdf]

| 2009/10 Hospital Trust*                                                 | Provider code | Cost adjusted total outputs (Inpatient and Outpatient) | Quality adjusted total outputs (Inpatient) & Cost adjusted total outputs (outpatient) | Total NHS inputs (expenditure) | TFP cost-adj       |         | TFP quality-adj    |         |
|-------------------------------------------------------------------------|---------------|--------------------------------------------------------|---------------------------------------------------------------------------------------|--------------------------------|--------------------|---------|--------------------|---------|
|                                                                         |               |                                                        |                                                                                       |                                | Standardised score | Ranking | Standardised score | Ranking |
| Queen Victoria Hospital NHS Foundation Trust                            | RPC           | 33,513                                                 | 33,798                                                                                | 49,213                         | 31.38              | 1       | 32.72              | 1       |
| East Lancashire Hospitals NHS Trust                                     | RXR           | 196,858                                                | 199,167                                                                               | 311,888                        | 21.77              | 5       | 23.41              | 2       |
| Mid Essex Hospital Services NHS Trust                                   | RQ8           | 130,166                                                | 125,974                                                                               | 199,625                        | 25.80              | 3       | 21.95              | 3       |
| Surrey and Sussex Healthcare NHS Trust                                  | RTP           | 96,971                                                 | 93,546                                                                                | 148,946                        | 25.60              | 4       | 21.37              | 4       |
| Great Western Hospitals NHS Foundation Trust                            | RN3           | 113,168                                                | 112,368                                                                               | 179,670                        | 21.51              | 6       | 20.86              | 5       |
| Robert Jones and Agnes Hunt Orthopaedic and District Hospital NHS Trust | RL1           | 39,818                                                 | 41,473                                                                                | 66,665                         | 15.23              | 18      | 20.23              | 6       |
| Mayday Healthcare NHS Trust                                             | RJ6           | 98,147                                                 | 99,267                                                                                | 160,015                        | 18.33              | 12      | 19.89              | 7       |
| South Warwickshire General Hospitals NHS Trust                          | RJC           | 73,872                                                 | 69,597                                                                                | 112,624                        | 26.54              | 2       | 19.42              | 8       |
| Newham University Hospital NHS Trust                                    | RNH           | 77,256                                                 | 82,756                                                                                | 134,853                        | 10.52              | 40      | 18.59              | 9       |
| Ashford and St Peter's Hospitals NHS Trust                              | RTK           | 111,923                                                | 107,818                                                                               | 178,012                        | 21.30              | 7       | 17.05              | 10      |
| Dartford and Gravesham NHS Trust                                        | RN7           | 70,813                                                 | 68,500                                                                                | 114,214                        | 19.61              | 8       | 15.90              | 11      |
| The Royal Orthopaedic Hospital NHS Foundation Trust                     | RRJ           | 37,883                                                 | 39,290                                                                                | 65,538                         | 11.51              | 35      | 15.86              | 12      |
| Warrington and Halton Hospitals NHS Foundation Trust                    | RWW           | 109,714                                                | 112,265                                                                               | 187,706                        | 12.76              | 28      | 15.58              | 13      |
| George Eliot Hospital NHS Trust                                         | RLT           | 59,039                                                 | 57,006                                                                                | 95,948                         | 18.71              | 10      | 14.82              | 14      |
| The Royal Wolverhampton Hospitals NHS Trust                             | RL4           | 157,491                                                | 153,762                                                                               | 259,552                        | 17.06              | 17      | 14.49              | 15      |
| Bedford Hospital NHS Trust                                              | RC1           | 70,394                                                 | 68,235                                                                                | 115,269                        | 17.82              | 13      | 14.40              | 16      |
| The Dudley Group of Hospitals NHS Foundation Trust                      | RNA           | 150,867                                                | 145,223                                                                               | 245,361                        | 18.62              | 11      | 14.38              | 17      |
| West Hertfordshire Hospitals NHS Trust                                  | RWG           | 122,135                                                | 118,708                                                                               | 200,814                        | 17.34              | 15      | 14.24              | 18      |
| Frimley Park Hospital NHS Foundation Trust                              | RDU           | 118,474                                                | 119,309                                                                               | 202,612                        | 12.81              | 27      | 13.80              | 19      |
| Wrightington, Wigan and Leigh NHS Foundation Trust                      | RRF           | 127,553                                                | 129,500                                                                               | 220,116                        | 11.79              | 33      | 13.70              | 20      |
| West Middlesex University Hospital NHS Trust                            | RFW           | 72,017                                                 | 73,967                                                                                | 125,920                        | 10.34              | 42      | 13.52              | 21      |
| South London Healthcare NHS Trust                                       | RYQ           | 245,887                                                | 237,087                                                                               | 403,881                        | 17.45              | 14      | 13.44              | 22      |
| Royal National Orthopaedic Hospital NHS Trust                           | RAN           | 34,113                                                 | 41,505                                                                                | 70,917                         | -7.20              | 125     | 13.10              | 23      |
| Milton Keynes Hospital NHS Foundation Trust                             | R08           | 80,102                                                 | 82,496                                                                                | 141,723                        | 9.04               | 47      | 12.49              | 24      |
| Royal Berkshire NHS Foundation Trust                                    | RHW           | 153,983                                                | 150,412                                                                               | 259,329                        | 14.55              | 19      | 12.09              | 25      |
| Dorset County Hospital NHS Foundation Trust                             | RBD           | 90,115                                                 | 84,610                                                                                | 146,068                        | 19.02              | 9       | 11.94              | 26      |
| The Hillingdon Hospital NHS Trust                                       | RAS           | 83,617                                                 | 84,838                                                                                | 147,394                        | 9.45               | 46      | 11.23              | 27      |
| Ealing Hospital NHS Trust                                               | RC3           | 60,759                                                 | 63,630                                                                                | 110,911                        | 5.69               | 61      | 10.87              | 28      |
| Barnet and Chase Farm Hospitals NHS Trust                               | RVL           | 152,054                                                | 146,980                                                                               | 256,599                        | 14.32              | 22      | 10.70              | 29      |
| Liverpool Women's NHS Foundation Trust                                  | REP           | 48,353                                                 | 49,349                                                                                | 86,294                         | 8.10               | 49      | 10.52              | 30      |
| Liverpool Heart and Chest Hospital NHS Trust                            | RBQ           | 47,296                                                 | 47,300                                                                                | 82,772                         | 10.24              | 44      | 10.43              | 31      |
| Heart of England NHS Foundation Trust                                   | RR1           | 302,479                                                | 299,860                                                                               | 525,851                        | 10.97              | 38      | 10.20              | 32      |
| Heatherwood and Wexham Park Hospitals NHS Foundation Trust              | RD7           | 122,174                                                | 121,542                                                                               | 213,410                        | 10.45              | 41      | 10.06              | 33      |
| West Suffolk Hospitals NHS Trust                                        | RGR           | 80,855                                                 | 77,840                                                                                | 136,849                        | 13.98              | 23      | 9.92               | 34      |
| Lancashire Teaching Hospitals NHS Foundation Trust                      | RXN           | 205,796                                                | 209,044                                                                               | 369,377                        | 7.48               | 52      | 9.37               | 35      |
| Gloucestershire Hospitals NHS Foundation Trust                          | RTE           | 235,117                                                | 227,683                                                                               | 402,679                        | 12.64              | 29      | 9.27               | 36      |
| Worcestershire Acute Hospitals NHS Trust                                | RWP           | 165,278                                                | 159,421                                                                               | 282,150                        | 13.01              | 25      | 9.19               | 37      |
| Chelsea and Westminster Hospital NHS Foundation Trust                   | RQM           | 130,513                                                | 137,512                                                                               | 243,698                        | 3.32               | 78      | 9.05               | 38      |
| The Princess Alexandra Hospital NHS Trust                               | RQW           | 83,626                                                 | 81,169                                                                                | 143,884                        | 12.13              | 32      | 9.02               | 39      |
| Kingston Hospital NHS Trust                                             | RAX           | 91,522                                                 | 88,793                                                                                | 157,412                        | 12.17              | 31      | 9.01               | 40      |
| Hinchingbrooke Health Care NHS Trust                                    | RQQ           | 49,111                                                 | 47,855                                                                                | 84,889                         | 11.61              | 34      | 8.94               | 41      |
| Countess of Chester Hospital NHS Foundation Trust                       | RJR           | 97,738                                                 | 97,046                                                                                | 172,239                        | 9.47               | 45      | 8.89               | 42      |
| Southport and Ormskirk Hospital NHS Trust                               | RVY           | 80,845                                                 | 76,948                                                                                | 136,858                        | 13.96              | 24      | 8.66               | 43      |
| Royal Cornwall Hospitals NHS Trust                                      | REF           | 163,695                                                | 157,644                                                                               | 280,830                        | 12.45              | 30      | 8.48               | 44      |
| Shrewsbury and Telford Hospital NHS Trust                               | RXW           | 143,205                                                | 139,561                                                                               | 248,965                        | 10.97              | 39      | 8.33               | 45      |

| 2009/10 Hospital Trust*                                               | Provider code | Cost adjusted total outputs (Inpatient and Outpatient) | Quality adjusted total outputs (Inpatient) & Cost adjusted total outputs (outpatient) | Total NHS inputs (expenditure) | TFP cost-adj       |         | TFP quality-adj    |         |
|-----------------------------------------------------------------------|---------------|--------------------------------------------------------|---------------------------------------------------------------------------------------|--------------------------------|--------------------|---------|--------------------|---------|
|                                                                       |               |                                                        |                                                                                       |                                | Standardised score | Ranking | Standardised score | Ranking |
| Whipps Cross University Hospital NHS Trust                            | RGC           | 105,547                                                | 105,469                                                                               | 188,171                        | 8.21               | 48      | 8.32               | 46      |
| Norfolk and Norwich University Hospitals NHS Foundation Trust         | RM1           | 228,251                                                | 215,033                                                                               | 384,459                        | 14.54              | 20      | 8.09               | 47      |
| Southampton University Hospitals NHS Trust                            | RHM           | 233,199                                                | 239,648                                                                               | 428,749                        | 4.93               | 70      | 8.02               | 48      |
| Walsall Hospitals NHS Trust                                           | RBK           | 89,346                                                 | 89,050                                                                                | 159,618                        | 7.99               | 50      | 7.81               | 49      |
| The Queen Elizabeth Hospital King's Lynn NHS Trust                    | RCX           | 83,244                                                 | 79,287                                                                                | 142,350                        | 12.82              | 26      | 7.64               | 50      |
| Peterborough and Stamford Hospitals NHS Foundation Trust              | RGN           | 111,493                                                | 111,270                                                                               | 200,295                        | 7.39               | 55      | 7.36               | 51      |
| University Hospital of North Staffordshire NHS Trust                  | RJE           | 215,682                                                | 215,012                                                                               | 387,287                        | 7.44               | 54      | 7.29               | 52      |
| Northampton General Hospital NHS Trust                                | RNS           | 111,950                                                | 113,310                                                                               | 205,467                        | 5.11               | 68      | 6.57               | 53      |
| Western Sussex Hospitals NHS Trust                                    | RYR           | 176,714                                                | 164,318                                                                               | 298,131                        | 14.35              | 21      | 6.51               | 54      |
| Plymouth Hospitals NHS Trust                                          | RK9           | 197,073                                                | 197,181                                                                               | 358,267                        | 6.12               | 59      | 6.36               | 55      |
| Sandwell and West Birmingham Hospitals NHS Trust                      | RXK           | 190,687                                                | 196,864                                                                               | 357,802                        | 2.82               | 82      | 6.33               | 56      |
| St George's Healthcare NHS Trust                                      | RJ7           | 195,074                                                | 203,324                                                                               | 371,147                        | 1.40               | 93      | 5.87               | 57      |
| The Royal Bournemouth and Christchurch Hospitals NHS Foundation Trust | RDZ           | 133,466                                                | 120,081                                                                               | 219,589                        | 17.26              | 16      | 5.68               | 58      |
| Southend University Hospital NHS Foundation Trust                     | RAJ           | 130,344                                                | 123,751                                                                               | 226,403                        | 11.07              | 36      | 5.63               | 59      |
| Pennine Acute Hospitals NHS Trust                                     | RW6           | 282,540                                                | 283,139                                                                               | 518,111                        | 5.21               | 65      | 5.61               | 60      |
| Luton and Dunstable Hospital NHS Foundation Trust                     | RC9           | 101,475                                                | 103,030                                                                               | 189,292                        | 3.42               | 77      | 5.19               | 61      |
| Tameside Hospital NHS Foundation Trust                                | RMP           | 74,071                                                 | 74,086                                                                                | 136,472                        | 4.71               | 73      | 4.91               | 62      |
| Barking, Havering and Redbridge Hospitals NHS Trust                   | RF4           | 192,696                                                | 187,752                                                                               | 346,917                        | 7.16               | 56      | 4.59               | 63      |
| The Rotherham NHS Foundation Trust                                    | RFR           | 97,051                                                 | 96,744                                                                                | 178,796                        | 4.72               | 72      | 4.57               | 64      |
| Colchester Hospital University NHS Foundation Trust                   | RDE           | 120,550                                                | 113,226                                                                               | 209,420                        | 11.05              | 37      | 4.48               | 65      |
| County Durham and Darlington NHS Foundation Trust                     | RXP           | 173,228                                                | 172,932                                                                               | 320,083                        | 4.41               | 75      | 4.41               | 66      |
| Salisbury NHS Foundation Trust                                        | RNZ           | 93,060                                                 | 91,136                                                                                | 168,820                        | 6.35               | 58      | 4.33               | 67      |
| St Helens and Knowsley Teaching Hospitals NHS Trust                   | RBN           | 115,191                                                | 117,498                                                                               | 218,701                        | 1.61               | 91      | 3.83               | 68      |
| Winchester and Eastleigh Healthcare NHS Trust                         | RN1           | 69,384                                                 | 66,893                                                                                | 124,537                        | 7.48               | 53      | 3.80               | 69      |
| Hereford Hospitals NHS Trust                                          | RLQ           | 58,876                                                 | 56,675                                                                                | 105,639                        | 7.52               | 51      | 3.68               | 70      |
| North Middlesex University Hospital NHS Trust                         | RAP           | 65,087                                                 | 68,629                                                                                | 128,068                        | -1.95              | 104     | 3.56               | 71      |
| City Hospitals Sunderland NHS Foundation Trust                        | RLN           | 154,497                                                | 155,077                                                                               | 290,063                        | 2.76               | 83      | 3.32               | 72      |
| Moorfields Eye Hospital NHS Foundation Trust                          | RP6           | 48,105                                                 | 52,730                                                                                | 98,742                         | -6.01              | 121     | 3.20               | 73      |
| Royal United Hospital Bath NHS Trust                                  | RD1           | 104,420                                                | 100,677                                                                               | 188,543                        | 6.84               | 57      | 3.19               | 74      |
| Kettering General Hospital NHS Foundation Trust                       | RNQ           | 92,541                                                 | 90,714                                                                                | 170,339                        | 4.81               | 71      | 2.92               | 75      |
| Poole Hospital NHS Foundation Trust                                   | RD3           | 102,713                                                | 99,746                                                                                | 187,531                        | 5.67               | 62      | 2.79               | 76      |
| Epsom and St Helier University Hospitals NHS Trust                    | RVR           | 140,016                                                | 135,815                                                                               | 255,542                        | 5.71               | 60      | 2.71               | 77      |
| Bradford Teaching Hospitals NHS Foundation Trust                      | RAE           | 153,033                                                | 161,184                                                                               | 303,399                        | -2.69              | 110     | 2.67               | 78      |
| Buckinghamshire Hospitals NHS Trust                                   | RXQ           | 133,812                                                | 130,155                                                                               | 245,586                        | 5.12               | 67      | 2.42               | 79      |
| Chesterfield Royal Hospital NHS Foundation Trust                      | RFS           | 92,700                                                 | 90,181                                                                                | 170,211                        | 5.07               | 69      | 2.39               | 80      |
| North Bristol NHS Trust                                               | RVJ           | 219,433                                                | 218,663                                                                               | 413,541                        | 2.37               | 88      | 2.18               | 81      |
| University Hospitals Coventry and Warwickshire NHS Trust              | RKB           | 211,533                                                | 213,106                                                                               | 403,931                        | 1.03               | 95      | 1.96               | 82      |
| Ipswich Hospital NHS Trust                                            | RGQ           | 112,773                                                | 108,891                                                                               | 206,547                        | 5.33               | 64      | 1.88               | 83      |
| Basingstoke and North Hampshire NHS Foundation Trust                  | RN5           | 76,034                                                 | 75,210                                                                                | 142,800                        | 2.72               | 84      | 1.78               | 84      |
| University Hospitals of Leicester NHS Trust                           | RWE           | 329,964                                                | 340,589                                                                               | 647,918                        | -1.75              | 102     | 1.59               | 85      |
| North Cumbria University Hospitals NHS Trust                          | RNL           | 109,457                                                | 105,520                                                                               | 200,742                        | 5.19               | 66      | 1.58               | 86      |
| University Hospitals of Morecambe Bay NHS Trust                       | RTX           | 131,055                                                | 125,569                                                                               | 239,782                        | 5.44               | 63      | 1.20               | 87      |
| East Sussex Hospitals NHS Trust                                       | RXC           | 147,389                                                | 134,562                                                                               | 257,910                        | 10.25              | 43      | 0.83               | 88      |
| Hull and East Yorkshire Hospitals NHS Trust                           | RWA           | 232,372                                                | 227,415                                                                               | 436,956                        | 2.60               | 85      | 0.58               | 89      |
| The Lewisham Hospital NHS Trust                                       | RJ2           | 73,131                                                 | 74,603                                                                                | 143,632                        | -1.77              | 103     | 0.38               | 90      |

| 2009/10 Hospital Trust*                                         | Provider code | Cost adjusted total outputs (Inpatient and Outpatient) | Quality adjusted total outputs (Inpatient) & Cost adjusted total outputs (outpatient) | Total NHS inputs (expenditure) | TFP cost-adj       |         | TFP quality-adj    |         |
|-----------------------------------------------------------------|---------------|--------------------------------------------------------|---------------------------------------------------------------------------------------|--------------------------------|--------------------|---------|--------------------|---------|
|                                                                 |               |                                                        |                                                                                       |                                | Standardised score | Ranking | Standardised score | Ranking |
| Mid Cheshire Hospitals NHS Foundation Trust                     | RBT           | 86,112                                                 | 84,164                                                                                | 162,531                        | 2.21               | 89      | 0.07               | 91      |
| Barnsley Hospital NHS Foundation Trust                          | RFF           | 81,738                                                 | 81,406                                                                                | 157,902                        | -0.13              | 99      | -0.37              | 92      |
| Calderdale and Huddersfield NHS Foundation Trust                | RWY           | 152,779                                                | 150,089                                                                               | 291,737                        | 1.03               | 94      | -0.58              | 93      |
| Royal Surrey County Hospital NHS Trust                          | RA2           | 98,010                                                 | 94,308                                                                                | 183,407                        | 3.09               | 80      | -0.63              | 94      |
| Doncaster and Bassetlaw Hospitals NHS Foundation Trust          | RP5           | 166,138                                                | 164,611                                                                               | 320,375                        | 0.04               | 98      | -0.71              | 95      |
| East Cheshire NHS Trust                                         | RJN           | 57,654                                                 | 54,709                                                                                | 106,484                        | 4.45               | 74      | -0.71              | 96      |
| Royal Bolton Hospital NHS Foundation Trust                      | RMC           | 96,304                                                 | 97,596                                                                                | 190,019                        | -2.22              | 107     | -0.74              | 97      |
| Basildon and Thurrock University Hospitals NHS Foundation Trust | RDD           | 126,107                                                | 123,547                                                                               | 241,501                        | 0.74               | 96      | -1.14              | 98      |
| James Paget University Hospitals NHS Foundation Trust           | RGP           | 89,874                                                 | 85,015                                                                                | 166,199                        | 4.32               | 76      | -1.15              | 99      |
| Portsmouth Hospitals NHS Trust                                  | RHU           | 202,590                                                | 200,216                                                                               | 391,540                        | -0.18              | 100     | -1.18              | 100     |
| Homerton University Hospital NHS Foundation Trust               | RQX           | 69,059                                                 | 73,787                                                                                | 145,039                        | -8.14              | 131     | -1.68              | 101     |
| Stockport NHS Foundation Trust                                  | RWJ           | 110,522                                                | 108,696                                                                               | 214,284                        | -0.50              | 101     | -1.97              | 102     |
| Mid Yorkshire Hospitals NHS Trust                               | RXF           | 190,394                                                | 190,544                                                                               | 375,639                        | -2.22              | 106     | -1.97              | 103     |
| Royal Liverpool and Broadgreen University Hospitals NHS Trust   | RQ6           | 174,228                                                | 183,394                                                                               | 361,844                        | -7.11              | 124     | -2.05              | 104     |
| Medway NHS Foundation Trust                                     | RPA           | 99,737                                                 | 100,352                                                                               | 198,008                        | -2.82              | 111     | -2.06              | 105     |
| North West London Hospitals NHS Trust                           | RV8           | 142,050                                                | 147,003                                                                               | 290,579                        | -5.69              | 119     | -2.23              | 106     |
| United Lincolnshire Hospitals NHS Trust                         | RWD           | 203,175                                                | 193,264                                                                               | 382,147                        | 2.57               | 86      | -2.27              | 107     |
| Oxford Radcliffe Hospitals NHS Trust                            | RTH           | 268,116                                                | 274,805                                                                               | 543,596                        | -4.85              | 116     | -2.30              | 108     |
| Burton Hospitals NHS Foundation Trust                           | RJF           | 72,679                                                 | 70,793                                                                                | 140,121                        | 0.07               | 97      | -2.36              | 109     |
| South Tees Hospitals NHS Trust                                  | RTR           | 216,143                                                | 218,658                                                                               | 435,122                        | -4.17              | 115     | -2.89              | 110     |
| The Whittington Hospital NHS Trust                              | RKE           | 66,522                                                 | 70,741                                                                                | 140,777                        | -8.84              | 136     | -2.89              | 111     |
| Nuffield Orthopaedic Centre NHS Trust                           | RBF           | 28,413                                                 | 29,028                                                                                | 57,857                         | -5.26              | 117     | -3.04              | 112     |
| Airedale NHS Trust                                              | RCF           | 61,364                                                 | 58,321                                                                                | 116,311                        | 1.78               | 90      | -3.10              | 113     |
| Yeovil District Hospital NHS Foundation Trust                   | RA4           | 55,643                                                 | 52,233                                                                                | 104,250                        | 2.97               | 81      | -3.17              | 114     |
| Scarborough and North East Yorkshire Health Care NHS Trust      | RCC           | 56,909                                                 | 53,247                                                                                | 107,086                        | 2.53               | 87      | -3.91              | 115     |
| Derby Hospitals NHS Foundation Trust                            | RTG           | 204,701                                                | 200,934                                                                               | 404,552                        | -2.38              | 109     | -4.01              | 116     |
| Harrogate and District NHS Foundation Trust                     | RCD           | 65,928                                                 | 61,913                                                                                | 125,292                        | 1.51               | 92      | -4.50              | 117     |
| Weston Area Health NHS Trust                                    | RA3           | 43,614                                                 | 40,092                                                                                | 81,484                         | 3.26               | 79      | -4.92              | 118     |
| Royal Free Hampstead NHS Trust                                  | RAL           | 190,578                                                | 199,369                                                                               | 406,088                        | -9.46              | 138     | -5.12              | 119     |
| Royal Devon and Exeter NHS Foundation Trust                     | RH8           | 166,507                                                | 161,791                                                                               | 331,495                        | -3.10              | 112     | -5.68              | 120     |
| Sherwood Forest Hospitals NHS Foundation Trust                  | RK5           | 111,624                                                | 111,178                                                                               | 228,171                        | -5.62              | 118     | -5.84              | 121     |
| Mid Staffordshire NHS Foundation Trust                          | RJD           | 77,393                                                 | 75,503                                                                                | 155,274                        | -3.84              | 113     | -6.03              | 122     |
| Nottingham University Hospitals NHS Trust                       | RX1           | 306,768                                                | 313,594                                                                               | 645,190                        | -8.27              | 132     | -6.07              | 123     |
| Maidstone and Tunbridge Wells NHS Trust                         | RWF           | 135,411                                                | 132,173                                                                               | 272,024                        | -3.97              | 114     | -6.10              | 124     |
| Sheffield Teaching Hospitals NHS Foundation Trust               | RHQ           | 373,753                                                | 380,970                                                                               | 784,579                        | -8.10              | 130     | -6.16              | 125     |
| The Walton Centre for Neurology and Neurosurgery NHS Trust      | RET           | 30,636                                                 | 31,095                                                                                | 64,137                         | -7.85              | 129     | -6.31              | 126     |
| The Newcastle Upon Tyne Hospitals NHS Foundation Trust          | RTD           | 328,446                                                | 342,872                                                                               | 711,606                        | -10.96             | 140     | -6.89              | 127     |
| South Devon Healthcare NHS Foundation Trust                     | RA9           | 104,861                                                | 99,222                                                                                | 207,178                        | -2.35              | 108     | -7.45              | 128     |
| South Tyneside NHS Foundation Trust                             | RE9           | 48,745                                                 | 48,335                                                                                | 101,806                        | -7.63              | 128     | -8.25              | 129     |
| East and North Hertfordshire NHS Trust                          | RWH           | 140,316                                                | 131,414                                                                               | 276,827                        | -2.21              | 105     | -8.26              | 130     |
| Brighton and Sussex University Hospitals NHS Trust              | RXH           | 171,517                                                | 168,943                                                                               | 358,048                        | -7.58              | 127     | -8.81              | 131     |
| Aintree University Hospitals NHS Foundation Trust               | REM           | 120,660                                                | 120,798                                                                               | 258,061                        | -9.80              | 139     | -9.54              | 132     |
| Northern Lincolnshire and Goole Hospitals NHS Foundation Trust  | RJL           | 140,019                                                | 137,524                                                                               | 294,771                        | -8.36              | 134     | -9.84              | 133     |
| Taunton and Somerset NHS Foundation Trust                       | RBA           | 110,791                                                | 106,734                                                                               | 228,841                        | -6.60              | 122     | -9.86              | 134     |
| University Hospitals Bristol NHS Foundation Trust               | RA7           | 196,564                                                | 210,827                                                                               | 452,124                        | -16.13             | 144     | -9.89              | 135     |

| 2009/10 Hospital Trust*                                             | Provider code | Cost adjusted total outputs (Inpatient and Outpatient) | Quality adjusted total outputs (Inpatient) & Cost adjusted total outputs (outpatient) | Total NHS inputs (expenditure) | TFP cost-adj       |         | TFP quality-adj    |         |
|---------------------------------------------------------------------|---------------|--------------------------------------------------------|---------------------------------------------------------------------------------------|--------------------------------|--------------------|---------|--------------------|---------|
|                                                                     |               |                                                        |                                                                                       |                                | Standardised score | Ranking | Standardised score | Ranking |
| Northumbria Healthcare NHS Foundation Trust                         | RTF           | 146,052                                                | 141,338                                                                               | 303,631                        | -7.20              | 126     | -10.04             | 136     |
| Alder Hey Children's NHS Foundation Trust                           | RBS           | 64,456                                                 | 75,320                                                                                | 162,258                        | -23.36             | 151     | -10.29             | 137     |
| Papworth Hospital NHS Foundation Trust                              | RGM           | 53,140                                                 | 52,173                                                                                | 112,854                        | -9.16              | 137     | -10.66             | 138     |
| Wirral University Teaching Hospital NHS Foundation Trust            | RBL           | 128,805                                                | 125,011                                                                               | 271,116                        | -8.34              | 133     | -10.89             | 139     |
| Blackpool, Fylde and Wyre Hospitals NHS Foundation Trust            | RXL           | 132,909                                                | 125,588                                                                               | 272,496                        | -5.90              | 120     | -10.93             | 140     |
| East Kent Hospitals University NHS Foundation Trust                 | RVV           | 217,731                                                | 208,036                                                                               | 451,578                        | -6.98              | 123     | -10.97             | 141     |
| Salford Royal NHS Foundation Trust                                  | RM3           | 138,431                                                | 147,952                                                                               | 322,000                        | -17.06             | 146     | -11.20             | 142     |
| Leeds Teaching Hospitals NHS Trust                                  | RR8           | 360,643                                                | 379,813                                                                               | 826,770                        | -15.85             | 143     | -11.22             | 143     |
| Trafford Healthcare NHS Trust                                       | RM4           | 41,644                                                 | 41,048                                                                                | 91,555                         | -12.25             | 142     | -13.36             | 144     |
| York Hospitals NHS Foundation Trust                                 | RCB           | 109,888                                                | 106,085                                                                               | 240,177                        | -11.73             | 141     | -14.64             | 145     |
| Imperial College Healthcare NHS Trust                               | RYJ           | 289,700                                                | 307,547                                                                               | 698,322                        | -19.97             | 150     | -14.89             | 146     |
| Northern Devon Healthcare NHS Trust                                 | RBZ           | 59,383                                                 | 55,139                                                                                | 125,440                        | -8.67              | 135     | -15.05             | 147     |
| King's College Hospital NHS Foundation Trust                        | RJZ           | 198,971                                                | 209,623                                                                               | 479,461                        | -19.94             | 149     | -15.51             | 148     |
| Central Manchester University Hospitals NHS Foundation Trust        | RW3           | 242,717                                                | 271,297                                                                               | 624,354                        | -25.00             | 154     | -16.03             | 149     |
| Cambridge University Hospitals NHS Foundation Trust                 | RGT           | 220,693                                                | 227,878                                                                               | 525,343                        | -18.96             | 148     | -16.17             | 150     |
| University Hospital of South Manchester NHS Foundation Trust        | RM2           | 136,648                                                | 136,121                                                                               | 317,106                        | -16.87             | 145     | -17.04             | 151     |
| North Tees and Hartlepool NHS Foundation Trust                      | RVW           | 110,423                                                | 111,942                                                                               | 261,337                        | -18.48             | 147     | -17.22             | 152     |
| Sheffield Children's NHS Foundation Trust                           | RCU           | 41,863                                                 | 48,983                                                                                | 115,192                        | -29.89             | 160     | -17.82             | 153     |
| Barts and The London NHS Trust                                      | RNJ           | 206,160                                                | 228,740                                                                               | 553,170                        | -28.10             | 157     | -20.09             | 154     |
| Birmingham Children's Hospital NHS Foundation Trust                 | RQ3           | 66,108                                                 | 77,739                                                                                | 188,436                        | -32.32             | 161     | -20.27             | 155     |
| Royal Brompton and Harefield NHS Trust                              | RT3           | 75,284                                                 | 80,766                                                                                | 201,421                        | -27.89             | 155     | -22.51             | 156     |
| Guy's and St Thomas' NHS Foundation Trust                           | RJ1           | 273,672                                                | 292,320                                                                               | 732,765                        | -27.95             | 156     | -22.91             | 157     |
| University College London Hospitals NHS Foundation Trust            | RRV           | 197,835                                                | 213,945                                                                               | 538,221                        | -29.09             | 159     | -23.18             | 158     |
| Birmingham Women's NHS Foundation Trust                             | RLU           | 33,306                                                 | 33,794                                                                                | 85,444                         | -24.80             | 153     | -23.57             | 159     |
| University Hospitals Birmingham NHS Foundation Trust                | RRK           | 177,955                                                | 190,758                                                                               | 483,912                        | -29.05             | 158     | -23.82             | 160     |
| Great Ormond Street Hospital For Children NHS Trust                 | RP4           | 74,906                                                 | 94,538                                                                                | 239,924                        | -39.77             | 163     | -23.85             | 161     |
| Gateshead Health NHS Foundation Trust                               | RR7           | 72,219                                                 | 71,745                                                                                | 182,142                        | -23.51             | 152     | -23.88             | 162     |
| The Royal Marsden NHS Foundation Trust                              | RPY           | 60,081                                                 | 66,683                                                                                | 188,288                        | -38.44             | 162     | -31.56             | 163     |
| Royal National Hospital for Rheumatic Diseases NHS Foundation Trust | RBB           | 5,425                                                  | 5,641                                                                                 | 17,938                         | -41.65             | 164     | -39.22             | 164     |
| The Christie NHS Foundation Trust                                   | RBV           | 33,269                                                 | 39,104                                                                                | 155,611                        | -58.75             | 165     | -51.44             | 165     |
| Clatterbridge Centre for Oncology NHS Foundation Trust              | REN           | 12,323                                                 | 13,603                                                                                | 60,561                         | -60.74             | 166     | -56.59             | 166     |

\* Hospital Trusts have been ordered according to the TFP quality-adj measure
