# Supplementary material for: Examining variations in hospital productivity in the English NHS
Source: Springer Nature journal article supplement (doi:10.1007/s10198-014-0569-5), 2014-02-24
Supplement: MOESM1 [file 8772794]

| 2008/09 Hospital Trust *                                                | Provider code | Cost adjusted total outputs (Inpatient and Outpatient) | Quality adjusted total outputs (Inpatient) & Cost adjusted total outputs (outpatient) | Total NHS inputs (expenditure) | TFP cost-adj       |         | TFP q-adj          |         |
|-------------------------------------------------------------------------|---------------|--------------------------------------------------------|---------------------------------------------------------------------------------------|--------------------------------|--------------------|---------|--------------------|---------|
|                                                                         |               |                                                        |                                                                                       |                                | Standardised score | Ranking | Standardised score | Ranking |
| Mid Essex Hospital Services NHS Trust                                   | RQ8           | 145,558                                                | 141,621                                                                               | 182,003                        | 48.93              | 1       | 45.01              | 1       |
| Liverpool Women's NHS Foundation Trust                                  | REP           | 55,382                                                 | 56,529                                                                                | 81,610                         | 26.38              | 4       | 29.09              | 2       |
| Bromley Hospitals NHS Trust                                             | RG3           | 101,704                                                | 97,311                                                                                | 142,887                        | 32.55              | 2       | 26.92              | 3       |
| Queen Victoria Hospital NHS Foundation Trust                            | RPC           | 30,818                                                 | 31,711                                                                                | 47,633                         | 20.48              | 11      | 24.07              | 4       |
| The Royal Orthopaedic Hospital NHS Foundation Trust                     | RRJ           | 38,059                                                 | 40,723                                                                                | 61,445                         | 15.35              | 25      | 23.51              | 5       |
| The Queen Elizabeth Hospital King's Lynn NHS Trust                      | RCX           | 87,808                                                 | 83,300                                                                                | 125,964                        | 29.81              | 3       | 23.24              | 6       |
| Robert Jones and Agnes Hunt Orthopaedic and District Hospital NHS Trust | RL1           | 38,463                                                 | 40,376                                                                                | 61,146                         | 17.14              | 18      | 23.06              | 7       |
| Mayday Healthcare NHS Trust                                             | RJ6           | 95,623                                                 | 96,350                                                                                | 146,057                        | 21.92              | 8       | 22.94              | 8       |
| Southampton University Hospitals NHS Trust                              | RHM           | 264,306                                                | 265,865                                                                               | 403,327                        | 22.03              | 7       | 22.85              | 9       |
| The Royal Wolverhampton Hospitals NHS Trust                             | RL4           | 156,784                                                | 153,444                                                                               | 236,016                        | 23.71              | 6       | 21.16              | 10      |
| Liverpool Heart and Chest Hospital NHS Trust                            | RBQ           | 45,468                                                 | 46,300                                                                                | 71,299                         | 18.76              | 14      | 21.02              | 11      |
| South Warwickshire General Hospitals NHS Trust                          | RJC           | 67,119                                                 | 63,988                                                                                | 98,933                         | 26.34              | 5       | 20.54              | 12      |
| Royal Cornwall Hospitals NHS Trust                                      | REF           | 173,453                                                | 168,330                                                                               | 267,895                        | 20.57              | 10      | 17.10              | 13      |
| The Princess Alexandra Hospital NHS Trust                               | RQW           | 80,043                                                 | 77,699                                                                                | 124,631                        | 19.60              | 13      | 16.19              | 14      |
| West Suffolk Hospitals NHS Trust                                        | RGR           | 81,509                                                 | 78,282                                                                                | 125,567                        | 20.88              | 9       | 16.18              | 15      |
| Bedford Hospital NHS Trust                                              | RC1           | 67,875                                                 | 67,423                                                                                | 108,307                        | 16.70              | 20      | 16.02              | 16      |
| Warrington and Halton Hospitals NHS Foundation Trust                    | RWW           | 100,487                                                | 103,493                                                                               | 166,395                        | 12.46              | 30      | 15.91              | 17      |
| The Dudley Group of Hospitals NHS Foundation Trust                      | RNA           | 137,354                                                | 132,917                                                                               | 213,757                        | 19.66              | 12      | 15.88              | 18      |
| Great Western Hospitals NHS Foundation Trust                            | RN3           | 106,414                                                | 106,574                                                                               | 171,412                        | 15.61              | 23      | 15.87              | 19      |
| Whipps Cross University Hospital NHS Trust                              | RGC           | 102,792                                                | 102,376                                                                               | 165,088                        | 15.95              | 22      | 15.57              | 20      |
| Hinchingbrooke Health Care NHS Trust                                    | RQQ           | 47,305                                                 | 46,419                                                                                | 75,162                         | 17.20              | 17      | 15.10              | 21      |
| Milton Keynes Hospital NHS Foundation Trust                             | RD8           | 78,591                                                 | 80,266                                                                                | 130,611                        | 12.05              | 33      | 14.53              | 22      |
| Chelsea and Westminster Hospital NHS Foundation Trust                   | RQM           | 127,374                                                | 124,713                                                                               | 219,503                        | 8.06               | 46      | 14.38              | 23      |
| Ealing Hospital NHS Trust                                               | RC3           | 62,041                                                 | 65,951                                                                                | 108,075                        | 6.90               | 49      | 13.73              | 24      |
| West Hertfordshire Hospitals NHS Trust                                  | RWG           | 119,016                                                | 114,297                                                                               | 187,787                        | 18.02              | 15      | 13.43              | 25      |
| The Hillingdon Hospital NHS Trust                                       | RAS           | 80,792                                                 | 81,499                                                                                | 134,169                        | 12.14              | 32      | 13.20              | 26      |
| Royal Berkshire NHS Foundation Trust                                    | RHW           | 153,248                                                | 152,440                                                                               | 251,121                        | 13.64              | 28      | 13.13              | 27      |
| George Eliot Hospital NHS Trust                                         | RLT           | 54,767                                                 | 52,623                                                                                | 86,717                         | 17.61              | 16      | 13.09              | 28      |
| Wrightington, Wigan and Leigh NHS Foundation Trust                      | RRF           | 118,539                                                | 120,660                                                                               | 200,336                        | 10.19              | 40      | 12.25              | 29      |
| Ashford and St Peter's Hospitals NHS Trust                              | RTK           | 104,165                                                | 101,245                                                                               | 168,136                        | 15.37              | 24      | 12.22              | 30      |
| Newham University Hospital NHS Trust                                    | RNH           | 72,940                                                 | 76,855                                                                                | 127,791                        | 6.29               | 53      | 12.08              | 31      |
| Surrey and Sussex Healthcare NHS Trust                                  | RTP           | 91,909                                                 | 87,984                                                                                | 147,158                        | 16.31              | 21      | 11.42              | 32      |
| Royal Brompton and Harefield NHS Trust                                  | RT3           | 104,189                                                | 113,541                                                                               | 190,714                        | 1.74               | 85      | 10.95              | 33      |
| Royal National Orthopaedic Hospital NHS Trust                           | RAN           | 29,058                                                 | 36,597                                                                                | 61,899                         | -12.58             | 145     | 10.19              | 34      |
| Pennine Acute Hospitals NHS Trust                                       | RW6           | 279,410                                                | 278,646                                                                               | 471,488                        | 10.36              | 39      | 10.14              | 35      |
| Frimley Park Hospital NHS Foundation Trust                              | RDU           | 110,115                                                | 110,678                                                                               | 187,416                        | 9.41               | 43      | 10.06              | 36      |
| Southport and Ormskirk Hospital NHS Trust                               | RVY           | 78,923                                                 | 75,832                                                                                | 128,453                        | 14.42              | 27      | 10.02              | 37      |
| South Tees Hospitals NHS Trust                                          | RTR           | 222,263                                                | 225,102                                                                               | 383,916                        | 7.81               | 47      | 9.27               | 38      |
| Heart of England NHS Foundation Trust                                   | RR1           | 284,859                                                | 282,928                                                                               | 484,058                        | 9.59               | 42      | 8.93               | 39      |
| Peterborough and Stamford Hospitals NHS Foundation Trust                | RGN           | 104,865                                                | 105,387                                                                               | 181,144                        | 7.81               | 48      | 8.42               | 40      |
| Luton and Dunstable Hospital NHS Foundation Trust                       | RC9           | 98,831                                                 | 101,111                                                                               | 174,258                        | 5.62               | 60      | 8.14               | 41      |
| Northampton General Hospital NHS Trust                                  | RNS           | 105,375                                                | 107,287                                                                               | 184,935                        | 6.11               | 54      | 8.12               | 42      |
| East Lancashire Hospitals NHS Trust                                     | RXR           | 168,160                                                | 174,543                                                                               | 301,033                        | 4.03               | 72      | 8.06               | 43      |
| St Helens and Knowsley Teaching Hospitals NHS Trust                     | RBN           | 113,673                                                | 115,644                                                                               | 199,619                        | 6.04               | 55      | 7.97               | 44      |

| 2008/09 Hospital Trust *                                        | Provider code | Cost adjusted total outputs (Inpatient and Outpatient) | Quality adjusted total outputs (Inpatient) & Cost adjusted total outputs (outpatient) | Total NHS inputs (expenditure) | TFP cost-adj       |         | TFP q-adj          |         |
|-----------------------------------------------------------------|---------------|--------------------------------------------------------|---------------------------------------------------------------------------------------|--------------------------------|--------------------|---------|--------------------|---------|
|                                                                 |               |                                                        |                                                                                       |                                | Standardised score | Ranking | Standardised score | Ranking |
| Royal West Sussex NHS Trust                                     | RPR           | 72,299                                                 | 67,905                                                                                | 117,333                        | 14.75              | 26      | 7.86               | 45      |
| West Middlesex University Hospital NHS Trust                    | RFW           | 66,081                                                 | 67,956                                                                                | 117,630                        | 4.62               | 69      | 7.66               | 46      |
| Barnet and Chase Farm Hospitals NHS Trust                       | RVL           | 139,405                                                | 134,699                                                                               | 233,491                        | 11.18              | 34      | 7.51               | 47      |
| James Paget University Hospitals NHS Foundation Trust           | RGP           | 94,649                                                 | 86,811                                                                                | 150,582                        | 17.05              | 19      | 7.44               | 48      |
| Gloucestershire Hospitals NHS Foundation Trust                  | RTE           | 233,448                                                | 226,240                                                                               | 393,148                        | 10.58              | 36      | 7.24               | 49      |
| North Middlesex University Hospital NHS Trust                   | RAP           | 64,599                                                 | 68,327                                                                                | 118,771                        | 1.29               | 90      | 7.21               | 50      |
| United Lincolnshire Hospitals NHS Trust                         | RWD           | 204,806                                                | 193,285                                                                               | 336,075                        | 13.49              | 29      | 7.18               | 51      |
| Kettering General Hospital NHS Foundation Trust                 | RNQ           | 88,378                                                 | 85,425                                                                                | 149,033                        | 10.43              | 37      | 6.82               | 52      |
| Tameside Hospital NHS Foundation Trust                          | RMP           | 72,150                                                 | 72,733                                                                                | 127,148                        | 5.67               | 59      | 6.61               | 53      |
| North Bristol NHS Trust                                         | RVJ           | 215,292                                                | 214,669                                                                               | 375,753                        | 6.70               | 50      | 6.47               | 54      |
| Dartford and Gravesham NHS Trust                                | RN7           | 65,837                                                 | 62,158                                                                                | 109,236                        | 12.24              | 31      | 6.05               | 55      |
| Countess of Chester Hospital NHS Foundation Trust               | RJR           | 92,495                                                 | 91,795                                                                                | 161,518                        | 6.64               | 51      | 5.92               | 56      |
| Walsall Hospitals NHS Trust                                     | RBK           | 86,252                                                 | 86,597                                                                                | 153,180                        | 4.86               | 67      | 5.36               | 57      |
| Lancashire Teaching Hospitals NHS Foundation Trust              | RXN           | 193,270                                                | 194,368                                                                               | 344,197                        | 4.57               | 70      | 5.24               | 58      |
| University Hospital of North Staffordshire NHS Trust            | RJE           | 198,019                                                | 198,172                                                                               | 351,368                        | 4.95               | 65      | 5.11               | 59      |
| St George's Healthcare NHS Trust                                | RJ7           | 178,390                                                | 184,505                                                                               | 327,643                        | 1.39               | 87      | 4.95               | 60      |
| Worcestershire Acute Hospitals NHS Trust                        | RWP           | 157,896                                                | 152,751                                                                               | 271,843                        | 8.16               | 44      | 4.72               | 61      |
| Kingston Hospital NHS Trust                                     | RAX           | 85,980                                                 | 82,436                                                                                | 148,098                        | 8.11               | 45      | 3.74               | 62      |
| Mid Cheshire Hospitals NHS Foundation Trust                     | RBT           | 85,449                                                 | 83,593                                                                                | 150,574                        | 5.68               | 58      | 3.46               | 63      |
| Heatherwood and Wexham Park Hospitals NHS Foundation Trust      | RD7           | 111,027                                                | 110,763                                                                               | 199,565                        | 3.60               | 76      | 3.44               | 64      |
| Shrewsbury and Telford Hospital NHS Trust                       | RXW           | 128,835                                                | 127,162                                                                               | 229,149                        | 4.70               | 68      | 3.42               | 65      |
| The Rotherham NHS Foundation Trust                              | RFR           | 92,163                                                 | 92,201                                                                                | 166,528                        | 3.06               | 78      | 3.18               | 66      |
| Plymouth Hospitals NHS Trust                                    | RK9           | 193,230                                                | 192,274                                                                               | 347,362                        | 3.59               | 77      | 3.16               | 67      |
| Nuffield Orthopaedic Centre NHS Trust                           | RBF           | 26,920                                                 | 27,937                                                                                | 50,550                         | -0.83              | 103     | 3.00               | 68      |
| Colchester Hospital University NHS Foundation Trust             | RDE           | 107,582                                                | 100,063                                                                               | 181,538                        | 10.36              | 38      | 2.72               | 69      |
| Winchester and Eastleigh Healthcare NHS Trust                   | RN1           | 68,899                                                 | 67,162                                                                                | 121,958                        | 5.20               | 64      | 2.63               | 70      |
| East Cheshire NHS Trust                                         | RJN           | 57,775                                                 | 55,789                                                                                | 101,722                        | 5.77               | 57      | 2.21               | 71      |
| East Sussex Hospitals NHS Trust                                 | RXC           | 142,548                                                | 132,342                                                                               | 241,338                        | 9.99               | 41      | 2.20               | 72      |
| Burton Hospitals NHS Foundation Trust                           | RJF           | 69,307                                                 | 67,453                                                                                | 123,457                        | 4.54               | 71      | 1.82               | 73      |
| Homerton University Hospital NHS Foundation Trust               | RQX           | 70,261                                                 | 74,561                                                                                | 136,712                        | -4.29              | 117     | 1.64               | 74      |
| Buckinghamshire Hospitals NHS Trust                             | RXQ           | 133,170                                                | 130,144                                                                               | 238,892                        | 3.81               | 74      | 1.53               | 75      |
| Doncaster and Bassetlaw Hospitals NHS Foundation Trust          | RP5           | 161,469                                                | 161,735                                                                               | 297,683                        | 1.01               | 92      | 1.25               | 76      |
| Stockport NHS Foundation Trust                                  | RWJ           | 108,760                                                | 107,201                                                                               | 197,564                        | 2.52               | 81      | 1.12               | 77      |
| Royal Bolton Hospital NHS Foundation Trust                      | RMC           | 94,203                                                 | 94,744                                                                                | 174,820                        | 0.35               | 95      | 1.00               | 78      |
| Basingstoke and North Hampshire NHS Foundation Trust            | RN5           | 72,428                                                 | 71,599                                                                                | 132,341                        | 1.92               | 84      | 0.83               | 79      |
| Hereford Hospitals NHS Trust                                    | RLQ           | 57,508                                                 | 54,984                                                                                | 101,718                        | 5.28               | 63      | 0.74               | 80      |
| Bradford Teaching Hospitals NHS Foundation Trust                | RAE           | 146,757                                                | 153,473                                                                               | 284,079                        | -3.80              | 116     | 0.68               | 81      |
| Ipswich Hospital NHS Trust                                      | RGQ           | 107,407                                                | 101,288                                                                               | 187,616                        | 6.61               | 52      | 0.61               | 82      |
| Royal Devon and Exeter NHS Foundation Trust                     | RH8           | 168,646                                                | 165,158                                                                               | 306,387                        | 2.50               | 82      | 0.46               | 83      |
| Basildon and Thurrock University Hospitals NHS Foundation Trust | RDD           | 120,382                                                | 117,286                                                                               | 218,060                        | 2.81               | 79      | 0.24               | 84      |
| Dorset County Hospital NHS Foundation Trust                     | RBD           | 80,642                                                 | 76,439                                                                                | 142,289                        | 5.54               | 61      | 0.12               | 85      |
| County Durham and Darlington NHS Foundation Trust               | RXP           | 165,546                                                | 165,863                                                                               | 309,781                        | -0.48              | 98      | -0.22              | 86      |
| University Hospitals of Leicester NHS Trust                     | RWE           | 308,135                                                | 318,853                                                                               | 596,267                        | -3.77              | 115     | -0.34              | 87      |
| Chesterfield Royal Hospital NHS Foundation Trust                | RFS           | 87,428                                                 | 84,979                                                                                | 158,968                        | 2.42               | 83      | -0.38              | 88      |

| 2008/09 Hospital Trust *                                              | Provider code | Cost adjusted total outputs (Inpatient and Outpatient) | Quality adjusted total outputs (Inpatient) & Cost adjusted total outputs (outpatient) | Total NHS inputs (expenditure) | TFP cost-adj       |         | TFP q-adj          |         |
|-----------------------------------------------------------------------|---------------|--------------------------------------------------------|---------------------------------------------------------------------------------------|--------------------------------|--------------------|---------|--------------------|---------|
|                                                                       |               |                                                        |                                                                                       |                                | Standardised score | Ranking | Standardised score | Ranking |
| Portsmouth Hospitals NHS Trust                                        | RHU           | 198,575                                                | 198,387                                                                               | 372,133                        | -0.63              | 100     | -0.65              | 89      |
| Norfolk and Norwich University Hospitals NHS Foundation Trust         | RM1           | 244,994                                                | 231,701                                                                               | 434,761                        | 4.94               | 66      | -0.68              | 90      |
| Sandwell and West Birmingham Hospitals NHS Trust                      | RXK           | 174,263                                                | 178,954                                                                               | 336,512                        | -3.56              | 113     | -0.89              | 91      |
| The Whittington Hospital NHS Trust                                    | RKE           | 64,184                                                 | 69,265                                                                                | 130,295                        | -8.27              | 133     | -0.93              | 92      |
| Moorfields Eye Hospital NHS Foundation Trust                          | RP6           | 42,714                                                 | 46,850                                                                                | 88,155                         | -9.77              | 135     | -0.96              | 93      |
| University Hospitals of Morecambe Bay NHS Trust                       | RTX           | 123,631                                                | 119,052                                                                               | 224,375                        | 2.61               | 80      | -1.12              | 94      |
| Derby Hospitals NHS Foundation Trust                                  | RTG           | 198,835                                                | 195,328                                                                               | 368,354                        | 0.52               | 94      | -1.18              | 95      |
| University Hospitals Coventry and Warwickshire NHS Trust              | RKB           | 203,235                                                | 202,536                                                                               | 382,044                        | -0.94              | 104     | -1.20              | 96      |
| Queen Mary's Sidcup NHS Trust                                         | RGZ           | 54,744                                                 | 51,992                                                                                | 98,162                         | 3.85               | 73      | -1.29              | 97      |
| Alder Hey Children's NHS Foundation Trust                             | RBS           | 72,929                                                 | 82,069                                                                                | 154,957                        | -12.36             | 144     | -1.30              | 98      |
| Salisbury NHS Foundation Trust                                        | RNZ           | 89,757                                                 | 88,668                                                                                | 167,700                        | -0.33              | 97      | -1.46              | 99      |
| Royal United Hospital Bath NHS Trust                                  | RD1           | 95,817                                                 | 93,016                                                                                | 176,112                        | 1.32               | 89      | -1.57              | 100     |
| Epsom and St Helier University Hospitals NHS Trust                    | RVR           | 131,548                                                | 127,296                                                                               | 241,117                        | 1.60               | 86      | -1.61              | 101     |
| Scarborough and North East Yorkshire Health Care NHS Trust            | RCC           | 56,165                                                 | 52,158                                                                                | 98,811                         | 5.85               | 56      | -1.63              | 102     |
| University Hospitals Bristol NHS Foundation Trust                     | RA7           | 204,401                                                | 217,754                                                                               | 413,575                        | -7.96              | 131     | -1.88              | 103     |
| Airedale NHS Trust                                                    | RCF           | 59,702                                                 | 57,745                                                                                | 109,713                        | 1.34               | 88      | -1.91              | 104     |
| Central Manchester University Hospitals NHS Foundation Trust          | RW3           | 264,489                                                | 297,021                                                                               | 565,208                        | -12.86             | 146     | -2.06              | 105     |
| Mid Yorkshire Hospitals NHS Trust                                     | RXF           | 180,131                                                | 177,297                                                                               | 337,530                        | -0.62              | 99      | -2.11              | 106     |
| Nottingham University Hospitals NHS Trust                             | RX1           | 302,173                                                | 309,920                                                                               | 590,461                        | -4.70              | 121     | -2.18              | 107     |
| Medway NHS Foundation Trust                                           | RPA           | 92,747                                                 | 93,317                                                                                | 177,850                        | -2.89              | 109     | -2.22              | 108     |
| Barnsley Hospital NHS Foundation Trust                                | RFF           | 76,828                                                 | 76,571                                                                                | 145,955                        | -1.98              | 107     | -2.23              | 109     |
| Mid Staffordshire NHS Foundation Trust                                | RJD           | 76,507                                                 | 74,476                                                                                | 141,990                        | 0.34               | 96      | -2.25              | 110     |
| Oxford Radcliffe Hospitals NHS Trust                                  | RTH           | 271,259                                                | 277,524                                                                               | 529,545                        | -4.61              | 119     | -2.33              | 111     |
| Royal Liverpool and Broadgreen University Hospitals NHS Trust         | RQ6           | 159,607                                                | 168,856                                                                               | 322,210                        | -7.75              | 129     | -2.33              | 112     |
| Blackpool, Fylde and Wyre Hospitals NHS Foundation Trust              | RXL           | 141,363                                                | 130,907                                                                               | 249,854                        | 5.36               | 62      | -2.36              | 113     |
| City Hospitals Sunderland NHS Foundation Trust                        | RLN           | 142,684                                                | 143,787                                                                               | 275,175                        | -3.44              | 112     | -2.62              | 114     |
| Royal Surrey County Hospital NHS Trust                                | RA2           | 86,379                                                 | 84,367                                                                                | 162,165                        | -0.81              | 102     | -3.04              | 115     |
| The Lewisham Hospital NHS Trust                                       | RJ2           | 70,683                                                 | 72,140                                                                                | 138,701                        | -5.10              | 124     | -3.07              | 116     |
| The Royal Bournemouth and Christchurch Hospitals NHS Foundation Trust | RDZ           | 123,999                                                | 108,385                                                                               | 208,418                        | 10.79              | 35      | -3.08              | 117     |
| Southend University Hospital NHS Foundation Trust                     | RAJ           | 112,811                                                | 109,921                                                                               | 211,445                        | -0.65              | 101     | -3.12              | 118     |
| Queen Elizabeth Hospital NHS Trust                                    | RG2           | 71,693                                                 | 70,572                                                                                | 135,784                        | -1.68              | 106     | -3.14              | 119     |
| Poole Hospital NHS Foundation Trust                                   | RD3           | 95,650                                                 | 91,343                                                                                | 175,959                        | 1.23               | 91      | -3.26              | 120     |
| Aintree University Hospitals NHS Foundation Trust                     | REM           | 127,473                                                | 125,126                                                                               | 241,292                        | -1.62              | 105     | -3.36              | 121     |
| Worthing and Southlands Hospitals NHS Trust                           | RPL           | 87,349                                                 | 80,725                                                                                | 156,699                        | 3.81               | 75      | -3.99              | 122     |
| Yeovil District Hospital NHS Foundation Trust                         | RA4           | 52,222                                                 | 49,635                                                                                | 96,444                         | 0.84               | 93      | -4.09              | 123     |
| East Kent Hospitals University NHS Foundation Trust                   | RVV           | 209,734                                                | 201,999                                                                               | 399,570                        | -2.25              | 108     | -5.79              | 124     |
| Hull and East Yorkshire Hospitals NHS Trust                           | RWA           | 210,458                                                | 207,887                                                                               | 412,110                        | -4.90              | 123     | -5.99              | 125     |
| Barking, Havering and Redbridge Hospitals NHS Trust                   | RF4           | 178,727                                                | 173,081                                                                               | 345,325                        | -3.62              | 114     | -6.59              | 126     |
| North Cumbria University Hospitals NHS Trust                          | RNL           | 105,184                                                | 102,408                                                                               | 205,531                        | -4.70              | 120     | -7.14              | 127     |
| North West London Hospitals NHS Trust                                 | RV8           | 131,512                                                | 136,005                                                                               | 273,080                        | -10.32             | 138     | -7.18              | 128     |
| Taunton and Somerset NHS Foundation Trust                             | RBA           | 106,194                                                | 101,870                                                                               | 204,740                        | -3.41              | 111     | -7.27              | 129     |
| The Walton Centre for Neurology and Neurosurgery NHS Trust            | RET           | 25,072                                                 | 25,726                                                                                | 51,913                         | -10.06             | 137     | -7.65              | 130     |
| Maidstone and Tunbridge Wells NHS Trust                               | RWF           | 131,634                                                | 127,124                                                                               | 257,608                        | -4.84              | 122     | -8.03              | 131     |
| The Newcastle Upon Tyne Hospitals NHS Foundation Trust                | RTD           | 317,232                                                | 331,979                                                                               | 673,249                        | -12.25             | 143     | -8.10              | 132     |

| 2008/09 Hospital Trust *                                            | Provider code | Cost adjusted total outputs (Inpatient and Outpatient) | Quality adjusted total outputs (Inpatient) & Cost adjusted total outputs (outpatient) | Total NHS inputs (expenditure) | TFP cost-adj       |         | TFP q-adj          |         |
|---------------------------------------------------------------------|---------------|--------------------------------------------------------|---------------------------------------------------------------------------------------|--------------------------------|--------------------|---------|--------------------|---------|
|                                                                     |               |                                                        |                                                                                       |                                | Standardised score | Ranking | Standardised score | Ranking |
| Harrogate and District NHS Foundation Trust                         | RCD           | 58,437                                                 | 55,207                                                                                | 112,154                        | -2.97              | 110     | -8.26              | 133     |
| Northumbria Healthcare NHS Foundation Trust                         | RTF           | 145,332                                                | 141,161                                                                               | 287,173                        | -5.76              | 125     | -8.39              | 134     |
| South Devon Healthcare NHS Foundation Trust                         | RA9           | 101,247                                                | 97,041                                                                                | 197,502                        | -4.54              | 118     | -8.43              | 135     |
| King's College Hospital NHS Foundation Trust                        | RJZ           | 196,721                                                | 212,057                                                                               | 435,992                        | -15.98             | 149     | -9.36              | 136     |
| Calderdale and Huddersfield NHS Foundation Trust                    | RWY           | 143,942                                                | 141,244                                                                               | 290,969                        | -7.88              | 130     | -9.53              | 137     |
| Royal Free Hampstead NHS Trust                                      | RAL           | 177,834                                                | 185,519                                                                               | 386,253                        | -14.26             | 148     | -10.49             | 138     |
| Northern Lincolnshire and Goole Hospitals NHS Foundation Trust      | RJL           | 136,704                                                | 130,998                                                                               | 274,239                        | -7.17              | 126     | -10.98             | 139     |
| Trafford Healthcare NHS Trust                                       | RM4           | 43,164                                                 | 42,576                                                                                | 89,310                         | -10.00             | 136     | -11.16             | 140     |
| Sheffield Children's NHS Foundation Trust                           | RCU           | 41,193                                                 | 49,244                                                                                | 103,444                        | -25.84             | 159     | -11.28             | 141     |
| Salford Royal NHS Foundation Trust                                  | RM3           | 131,148                                                | 139,903                                                                               | 294,757                        | -17.14             | 151     | -11.54             | 142     |
| Wirral University Teaching Hospital NHS Foundation Trust            | RBL           | 125,474                                                | 123,118                                                                               | 260,730                        | -10.38             | 139     | -12.00             | 143     |
| Brighton and Sussex University Hospitals NHS Trust                  | RXH           | 161,832                                                | 160,606                                                                               | 340,139                        | -11.40             | 141     | -12.00             | 144     |
| Sherwood Forest Hospitals NHS Foundation Trust                      | RK5           | 102,299                                                | 102,364                                                                               | 217,094                        | -12.25             | 142     | -12.13             | 145     |
| Northern Devon Healthcare NHS Trust                                 | RBZ           | 58,175                                                 | 54,324                                                                                | 117,017                        | -7.42              | 127     | -13.48             | 146     |
| East and North Hertfordshire NHS Trust                              | RWH           | 124,732                                                | 116,990                                                                               | 252,729                        | -8.09              | 132     | -13.73             | 147     |
| York Hospitals NHS Foundation Trust                                 | RCB           | 106,309                                                | 102,254                                                                               | 221,830                        | -10.76             | 140     | -14.09             | 148     |
| Weston Area Health NHS Trust                                        | RA3           | 38,551                                                 | 35,669                                                                                | 77,643                         | -7.54              | 128     | -14.39             | 149     |
| Papworth Hospital NHS Foundation Trust                              | RGM           | 52,048                                                 | 48,991                                                                                | 107,040                        | -9.45              | 134     | -14.70             | 150     |
| South Tyneside NHS Foundation Trust                                 | RE9           | 45,617                                                 | 44,989                                                                                | 98,380                         | -13.65             | 147     | -14.78             | 151     |
| Birmingham Women's NHS Foundation Trust                             | RLU           | 34,819                                                 | 35,263                                                                                | 77,774                         | -16.63             | 150     | -15.50             | 152     |
| Sheffield Teaching Hospitals NHS Foundation Trust                   | RHQ           | 324,873                                                | 333,260                                                                               | 735,139                        | -17.70             | 152     | -15.52             | 153     |
| University Hospital of South Manchester NHS Foundation Trust        | RM2           | 133,956                                                | 135,662                                                                               | 303,544                        | -17.82             | 153     | -16.71             | 154     |
| Imperial College Healthcare NHS Trust                               | RYJ           | 267,038                                                | 285,769                                                                               | 650,777                        | -23.59             | 157     | -18.16             | 155     |
| Leeds Teaching Hospitals NHS Trust                                  | RR8           | 332,920                                                | 349,626                                                                               | 801,195                        | -22.62             | 156     | -18.67             | 156     |
| Birmingham Children's Hospital NHS Foundation Trust                 | RQ3           | 63,677                                                 | 75,482                                                                                | 173,453                        | -31.63             | 163     | -18.90             | 157     |
| Gateshead Health NHS Foundation Trust                               | RR7           | 71,788                                                 | 72,870                                                                                | 169,782                        | -21.26             | 154     | -20.01             | 158     |
| North Tees and Hartlepool NHS Foundation Trust                      | RVW           | 102,991                                                | 105,741                                                                               | 247,451                        | -22.49             | 155     | -20.36             | 159     |
| Cambridge University Hospitals NHS Foundation Trust                 | RGT           | 198,433                                                | 205,557                                                                               | 483,736                        | -23.61             | 158     | -20.81             | 160     |
| Barts and The London NHS Trust                                      | RNJ           | 185,183                                                | 203,929                                                                               | 484,807                        | -28.87             | 161     | -21.61             | 161     |
| Guy's and St Thomas' NHS Foundation Trust                           | RJ1           | 252,766                                                | 271,501                                                                               | 662,054                        | -28.90             | 162     | -23.57             | 162     |
| University Hospitals Birmingham NHS Foundation Trust                | RRK           | 170,841                                                | 182,456                                                                               | 446,432                        | -28.74             | 160     | -23.83             | 163     |
| Great Ormond Street Hospital For Children NHS Trust                 | RP4           | 63,033                                                 | 83,728                                                                                | 226,096                        | -48.08             | 166     | -30.99             | 164     |
| University College London Hospitals NHS Foundation Trust            | RRV           | 169,696                                                | 184,068                                                                               | 499,793                        | -36.77             | 164     | -31.36             | 165     |
| The Royal Marsden NHS Foundation Trust                              | RPY           | 50,452                                                 | 54,466                                                                                | 166,403                        | -43.54             | 165     | -39.00             | 166     |
| Royal National Hospital for Rheumatic Diseases NHS Foundation Trust | RBB           | 5,018                                                  | 5,364                                                                                 | 18,019                         | -48.14             | 167     | -44.52             | 167     |
| The Christie NHS Foundation Trust                                   | RBV           | 30,748                                                 | 34,693                                                                                | 144,893                        | -60.48             | 168     | -55.38             | 168     |
| Clatterbridge Centre for Oncology NHS Foundation Trust              | REN           | 10,536                                                 | 11,713                                                                                | 57,602                         | -65.94             | 169     | -62.10             | 169     |

\* Hospital Trusts have been ordered according to the TFP quality-adj measure
